# Supplementary material for: Major Role for Amphotericin B–Flucytosine Combination in Severe Cryptococcosis
Source: PLoS One. 2008 Aug 6;3(8):e2870. doi: 10.1371/journal.pone.0002870 (PMC2483933; doi:10.1371/journal.pone.0002870)
Supplement: Table S1 — (0.02 MB XLS) [file pone.0002870.s001.xls]

## Sheet: TableS1_LCR+VIH+
Table S1: determinants of prescription of amphotericin B (AMB), fluconazole (FCZ) or the combination of amphotericin B and flucytosine (AMB+5FC) for induction therapy of cryptococcal meningoencephalitis in HIV-infected patients (n = 120)
	No./No. evaluated (%) of patients			Univariate OR [CI95%]	P	Adjusted OR [CI95%]	P
	AMB	FCZ	AMB+5FC	AMB vs. AMB+5FC		AMB vs. AMB+5FC
	(n=30)	(n=15)	(n=75)	FCZ vs. AMB+5FC		FCZ vs. AMB+5FC
> 40 years old	9/30 (30)	8/15 (53)	21/75 (28)	1.10 [0.44-2.79]	0.838	0.90 [0.30-2.66]	0.843
				2.94 [0.95-9.12]	0.062	3.73 [1.01-13.74]	0.048
Male gender	27/30 (90)	13/15 (87)	58/75 (77)	2.64 [0.71-9.77]	0.147
				1.91 [0.39-9.28]	0.425
Born in Africa	9/29 (31)	4/15 (27)	27/75 (36)	0.8 [0.32-2.00]	0.633
				0.65 [0.19-2.23]	0.490
Living in Paris area	18/30 (60)	8/15 (53)	51/75 (68)	0.71 [0.29-1.70]	0.436
				0.54 [0.17-1.66]	0.280
Current or past smoker	15/27 (56)	8/14 (57)	44/73 (60)	0.82 [0.34-2.01]	0.670
				0.88 [0.28-2.80]	0.827
Tertiary care hospital	7/30 (23)	8/15 (53)	20/75 (27)	0.84 [0.31-2.25]	0.724
				3.14 [1.01-9.79]	0.048
Abnormal neurology	13/30 (43)	6/15 (40)	34/75 (45)	0.92 [0.39-2.16]	0.852
				0.80 [0.26-2.49]	0.705
Natremia < 134 mEq/L	18/30 (60)	9/15 (60)	42/74 (57)	1.14 [0.48-2.71]	0.762
				1.14 [0.37-3.54]	0.817
Fungemia	13/28 (46)	3/13 (23)	43/75 (57)	0.64 [0.27-1.54]	0.324
				0.22 [0.06-0.88]	0.032
Abnormal brain imaging	7/28 (25)	4/14 (29)	25/72 (35)	0.63 [0.23-1.68]	0.352
				0.75 [0.21-2.64]	0.657
High (≥ 1:512) CSF antigen titer	10/25 (40)	3/13 (23)	46/69 (67)	0.33 [0.13-0.86]	0.023	0.34 [0.13-0.87]	0.025
				0.15 [0.04-0.60]	0.007	0.13 [0.03-0.53]	0.005
High (≥ 1:512) serum antigen titer	13/28 (46)	3/14 (21)	44/72 (61)	0.55 [0.23-1.33]	0.186
				0.17 [0.04-0.68]	0.012
