# Supplementary material for: Major Role for Amphotericin B–Flucytosine Combination in Severe Cryptococcosis
Source: PLoS One. 2008 Aug 6;3(8):e2870. doi: 10.1371/journal.pone.0002870 (PMC2483933; doi:10.1371/journal.pone.0002870)
Supplement: Table S2 — (0.02 MB XLS) [file pone.0002870.s002.xls]

## Sheet: TableS2
Table S2: Comparison of clinical presentation and outcome in patients with cryptococcosis (n = 129) whose treatment regimen was composed of induction therapy with fluconazole (FCZ) alone, amphotericin B (AMB) alone or the combination of amphotericin B+ flucytosine (5FC), followed by prescription of FCZ
		Patients with the following regimena, no./no. evaluated (%)
		FCZ(1)FCZ(2)	AMB+5FC(1)FCZ(2)	AMB(1)FCZ(2)
		(n = 30)	(n = 63)	(n =36)
Baseline parameters
	> 40 years-old	17/30 (57)	21/63 (33)	17/36 (47)	0.084
	Male gender	23/30 (77)	48/63 (76)	31/36 (86)	0.473
	HIV infection	18/30 (60)	54/63 (86)	28/36 (78)	0.021
	Haematological malignancy	5/30 (17)	3/63 (5)	2/34 (5.5)	0.159
	Abnormal neurology	5/30 (17)	20/63 (32)	12/36 (33)	0.248
	Meningoencephalitis	15/26 (58)	57/61 (93)	33/36 (92)	<0.001
	Abnormal brain imaging	3/15 (20)	17/56 (30)	7/33 (21)	0.607
	Fungemia	7/29 (24)	28/63 (44)	13/34 (38)	0.176
	High (≥ 1:512) CSF antigen titer	2/20 (10)	30/56 (54)	10/28 (36)	0.003
	High (≥ 1:512) serum antigen titer	4/30 (13)	29/60 (48)	15/34 (44)	0.004
	Serotype A isolate	15/30 (50)	50/58 (86)	25/36 (69)	0.001
Parameters at the Wk2 workup
	Positive CSF India ink staining	2/13 (15)	37/51 (73)	15/30 (50)	0.001
	Mycological failure at Wk2	7/27 (26)	12/59 (20)	17/33 (52)	0.007
Outcome at Mo3 or end of follow-up
	Deaths between Wk2 and Mo3	2/30 (7)	6/63 (10)	4/36 (11)	0.925
	Treatment failure at Mo3	4/24 (17)	6/58 (10)	5/30 (17)	0.613
Treatments characteristics
	non optimal AMB+5FC induction Rx		42/63 (67)		-
	non optimal AMB induction Rx		21/63 (33)	16/36 (44)	0.272
	non optimal 5FC induction Rx		38/63 (60)		-
	Mean AMB duration in days ± SD		19 ± 9	23 ± 15	0.82
	Mean AMB cumulative dose in mg ± SDa		1322 ± 1944	2083 ± 3252	0.33
	Mean 5FC duration in days ± SD		18 ± 7		-
	Mean 5FC cumulative dose in mg ± SD		119 ± 62		-
	Mean FCZ duration in days ± SD	82 ± 19	63 ± 20	58 ± 23	<0.001
	Mean FCZ cumulative dose in mg ± SD	39 ± 17	29 ± 12	27 ± 16	0.006
Abbreviations: FCZ fluconazole, AMB amphotericin B, 5FC flucytosine
a Cumulative dose =duration in days * daily dosage in mg/kg * weight in kg.
